# Supplementary material for: Lignin-assisted solid-phase synthesis of nano-CuO for a photocatalyst with excellent catalytic activity and high performance supercapacitor electrodes
Source: Royal Society of Chemistry journal article supplement (doi:10.1039/c6ra11911e), 2016-01-01
Supplement: c6ra11911e1.pdf [file c6ra11911e1.pdf]

Supporting Information for:

## Lignin-assisted solid-phase synthesis of nano-CuO for photocatalyst with excellent catalytic activity and high performance supercapacitor electrodes

Xiaohong Wang<sup>a,\*</sup>, Fangsheng Wu<sup>a</sup>, Yawei Duan<sup>a</sup>, Yingying Wang<sup>a</sup>, Chen Hao<sup>a,\*</sup> and Cunwang Ge<sup>b</sup>

<sup>a</sup>School of Chemistry and Chemical Engineering, Jiangsu University, Zhenjiang, Jiangsu 212013, China

<sup>b</sup>School of Chemistry and Chemical Engineering, Nantong University, Nantong, Jiangsu 226019, China

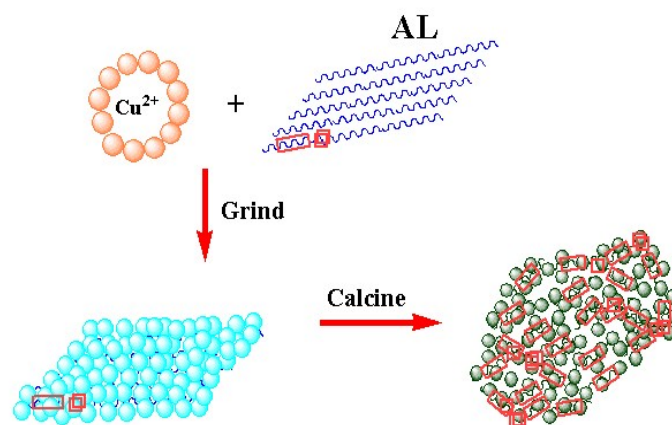

Fig. S1 The formation mechanism of CA sample

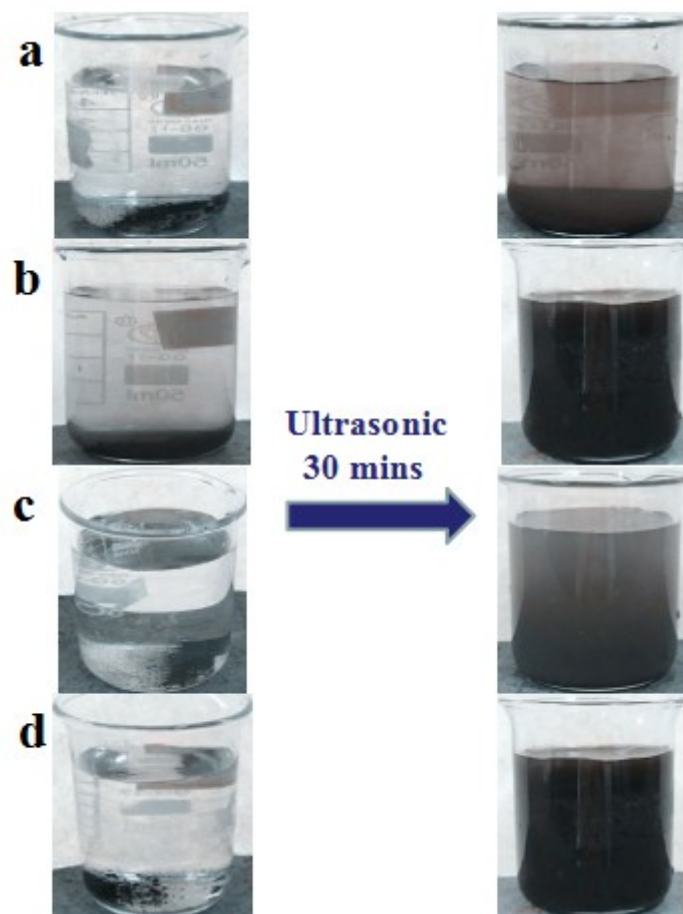

**Fig. S2** the dispersion case of (a) CuO, (b) C-500, (c) CA0.5 and (d) CA0.5-500

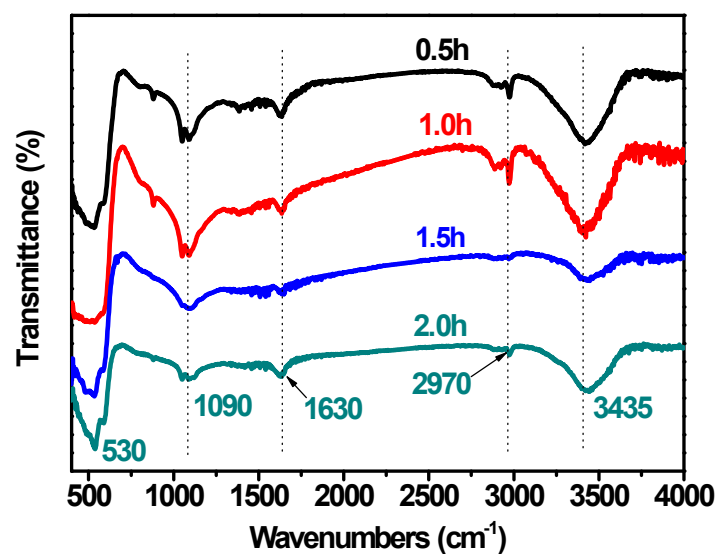

**Fig. S3** FTIR spectra of the CA0.5-500 samples at different calcination time

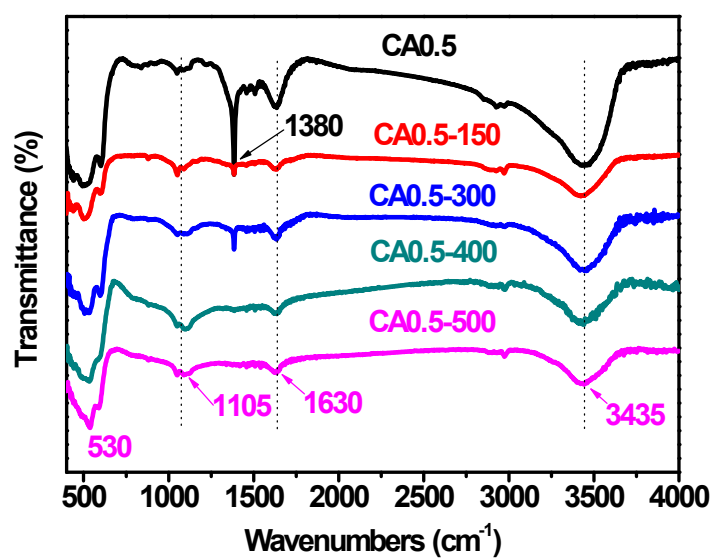

**Fig. S4** FTIR spectra of the CA0.5 samples at different calcination temperature
